# Supplementary material
Source: Springer Nature journal article supplement (https://www.springermedizin.de/resource/supplementary/12903_2014_434_MOESM2_ESM.docx/9516688)

Fig. 2. Distribution of Oral Health Impact Profile-14 score.


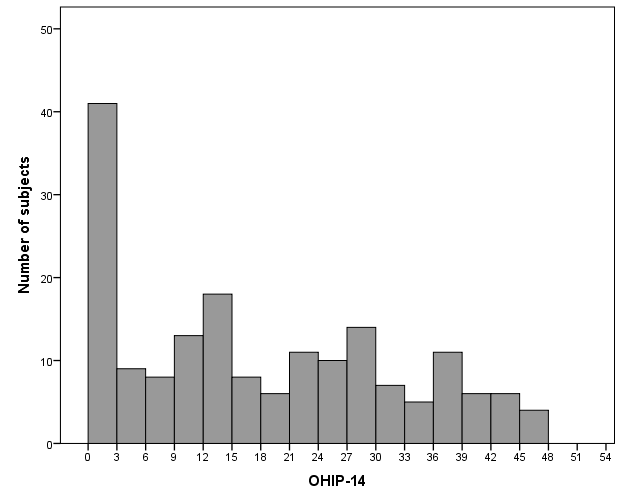

Supplement: MOESM2 [file 9516688]
